# Supplementary material for: Conformation-selective coordination-driven self-assembly of a ditopic donor with PdII acceptors
Source: Royal Society of Chemistry journal article supplement (doi:10.1039/c5dt03185k), 2015-01-01
Supplement: c5dt03185k1.pdf [file c5dt03185k1.pdf]

## Supporting Information

### Conformation-selective coordination-driven self-assembly of a ditopic donor with Pd<sup>II</sup> acceptors

Prodip Howlader,<sup>a</sup> Sandip Mukherjee,<sup>a</sup> Rajat Saha,<sup>b</sup> and Partha Sarathi Mukherjee<sup>a\*</sup>

<sup>a</sup> Department of Inorganic and Physical Chemistry, Indian Institute of Science, Bangalore 560012, India

<sup>b</sup> Guru Ghasidas Central University, Koni, Bilaspur, CG-495009, India

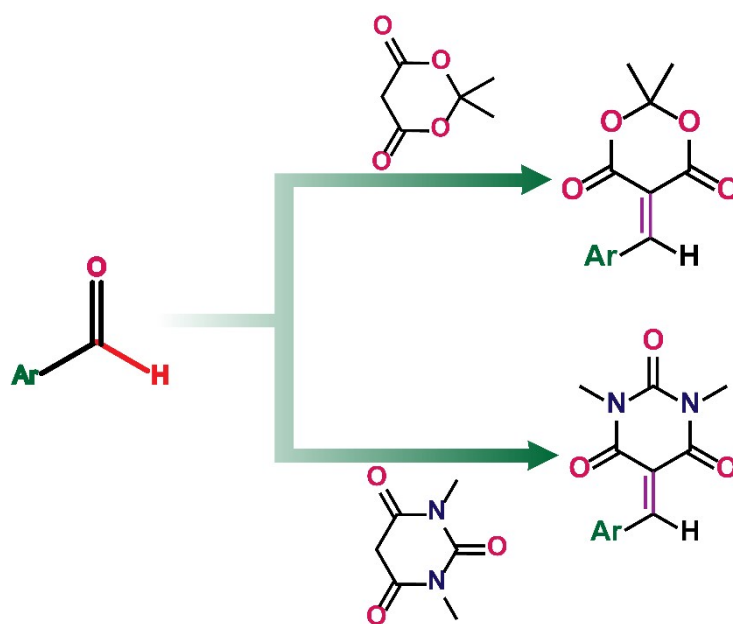

**Table S1:** Knoevenegal condensation products from different aromatic aldehydes and active methylene compounds.

| Aldhydes     | Active methylene compound       | Product |
|--------------|---------------------------------|---------|
| Pyrene-1     | Meldrum's acid (5eqv)           | 1a      |
| Pyrene-1     | Dimethyl Barbituric acid (2eqv) | 1b      |
| 9-Anthracene | Dimethyl Barbituric acid        | 2b      |
| 1-naphthyl   | Meldrum's acid                  | 3a      |
| 1-naphthyl   | Dimethyl Barbituric acid        | 3b      |
| 2-naphthyl   | Meldrum's acid                  | 4a      |
| 2-naphthyl   | Dimethyl Barbituric acid        | 4b      |

Same reaction was studied in case of 9-anthracenealdehyde and dimethylbarbituric acid with equivalent amount of the ligand (**L-meta**) and also with **Pd(NO<sub>3</sub>)<sub>2</sub>** in water to confirm the catalytic activity of the cage (**[(CG-1)(NO<sub>3</sub>)<sub>12</sub>]**). The results are assembled in Table S2.

**Table S2:** Knoevenegal condensation products from 9-anthracene aldehydes and dimethyl barbituric acid.

| Aldehyde     | Active Methylene Compound | Solvent | Time   | Reagent                               | Yield |
|--------------|---------------------------|---------|--------|---------------------------------------|-------|
| 9-Anthracene | Dimethyl Barbituric acid  | Water   | 55 hrs | <b>L-meta</b>                         | 9%    |
| 9-Anthracene | Dimethyl Barbituric acid  | Water   | 55 hrs | <b>Pd(NO<sub>3</sub>)<sub>2</sub></b> | 8%    |
| 9-Anthracene | Dimethyl Barbituric acid  | Water   | 55 hrs | <b>MC-3</b>                           | 12%   |

#### Characterization of the Knoevenegal products:

All the Knoevenegal products were isolated and purified by preparative TLC using chloroform. The products were characterized by <sup>1</sup>H-NMR spectroscopy.

#### 2,2-dimethyl-5-(pyren-1-ylmethylene)-1,3-dioxane-4,6-dione (1a):

<sup>1</sup>H NMR (400 MHz, CDCl<sub>3</sub>): δ=9.61 (s, 1H), 8.52 (d, 1H), 8.37–8.07 (m, 8H), 1.92 ppm (s, 6H).

#### 1,3-dimethyl-5-(pyren-1-ylmethylene)pyrimidine-2,4,6(1H,3H,5H)-trione (1b):

<sup>1</sup>H NMR (400 MHz, CDCl<sub>3</sub>): δ = 9.56 (s, 1H), 8.47 (d, 1H, H), 8.27-8.03 (m, 8H), 3.51 (s, 3H), 3.35 (s, 3H).

#### 5-(anthracen-10-ylmethylene)-2,2-dimethyl-1,3-dioxane-4,6-dione (2a):

<sup>1</sup>H NMR (400 MHz, CDCl<sub>3</sub>): δ = 9.47(s, 1H), 8.55(s, 1H), 8.06 (d, 2H), 7.83(d, 2H), 7.52-7.49(m, 4H), 1.90(s, 6H).

#### 5-(anthracen-10-ylmethylene)-1,3-dimethylpyrimidine-2,4,6(1H,3H,5H)-trione(2b):

$^1\text{H}$  NMR ( $\text{CDCl}_3$ , 400 MHz)  $\delta$ = 9.45 (s, 1H), 8.54 (s, 1H), 8.05 (dd, 2H), 7.82 (dd, 2H), 7.49 (m, 4H), 3.54 (s, 3H, H), 3.17 (s, 3H).

**2,2-dimethyl-5-(naphthalen-1-ylmethylene)-1,3-dioxane-4,6-dione (3a):**

$^1\text{H}$  NMR (400 MHz,  $\text{CDCl}_3$ ):  $\delta$  = 9.23 (s, 1H), 8.02 (d, 2H), 7.98 (d, 1H), 7.91 (d, 1H), 7.64–7.52 (m, 3H), 1.87 (s, 6H).

**1,3-dimethyl-5-(naphthalen-1-ylmethylene)pyrimidine-2,4,6(1H,3H,5H)-trione(3b):**

$^1\text{H}$  NMR (400 MHz,  $\text{CDCl}_3$ ):  $\delta$  = 9.23 (s, 1H), 7.97 (t, 2H), 7.90 (d, 1H), 7.86 (d, 1H), 7.55 (m, 3H), 3.46 (s, 3H), 3.30 (s, 3H).

**2,2-dimethyl-5-(naphthalen-2-ylmethylene)-1,3-dioxane-4,6-dione (4a):**

$^1\text{H}$  NMR (400 MHz,  $\text{CDCl}_3$ ):  $\delta$  = 8.59 (s, 1H), 8.55 (s, 1H), 8.12 (dd, 1H), 7.94 (d, 1H), 7.88 (d, 1H), 7.86 (d, 1H), 7.63 (td, 1H), 7.56 (td, 1H), 1.84 (s, 6H).

**1,3-dimethyl-5-(naphthalen-2-ylmethylene)pyrimidine-2,4,6(1H,3H,5H)-trione (4b):**

$^1\text{H}$  NMR (400 MHz,  $\text{CDCl}_3$ ):  $\delta$  = 8.74 (s, 1H), 8.51 (s, 1H), 8.14 (d, 1H), 7.94 (d, 1H), 7.87 (dd, 2H), 7.62 (t, 1H), 7.54 (t, 1H), 3.45 (s, 3H), 3.41 (s, 3H).

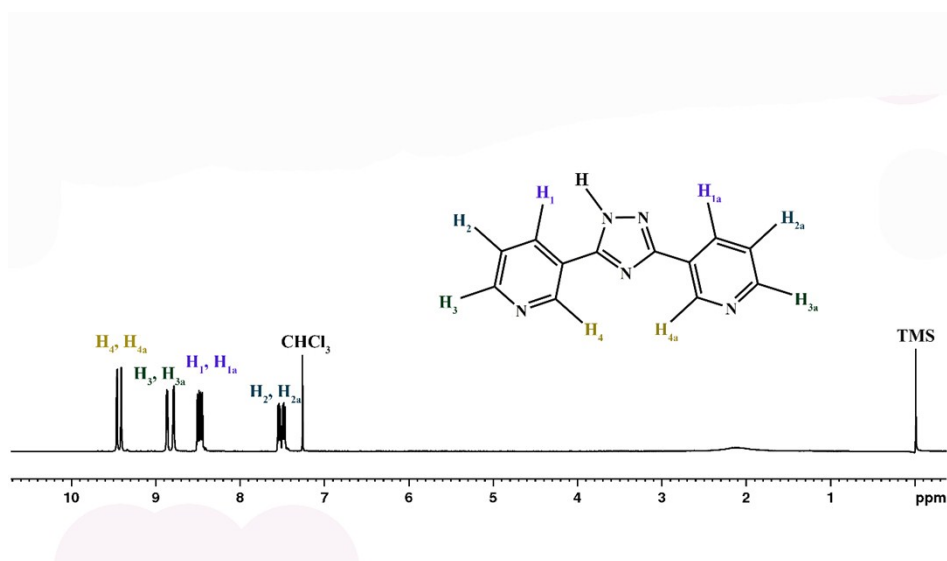

**Figure S1.**  $^1\text{H}$ -NMR spectra of ligand L recorded in  $\text{CDCl}_3$ .

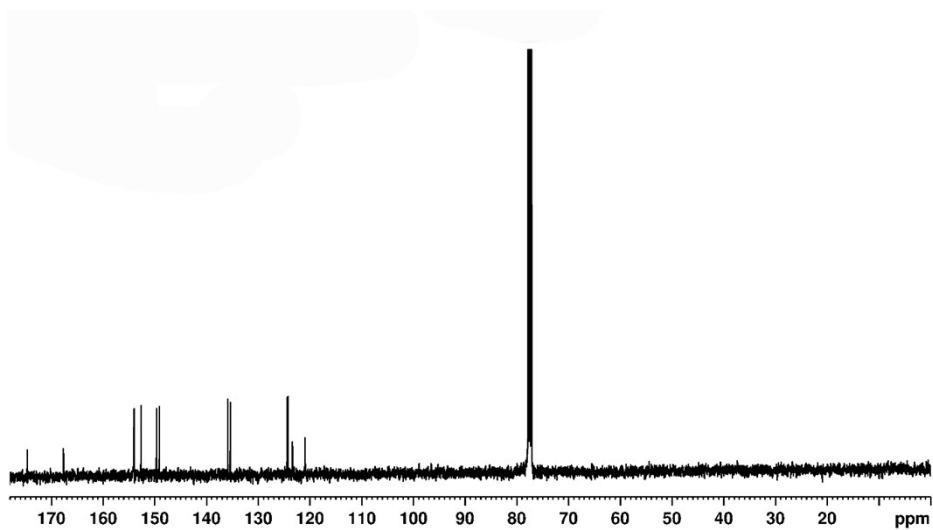

**Figure S2.**  $^{13}\text{C}$ -NMR spectra of ligand L recorded in  $\text{CDCl}_3$ .

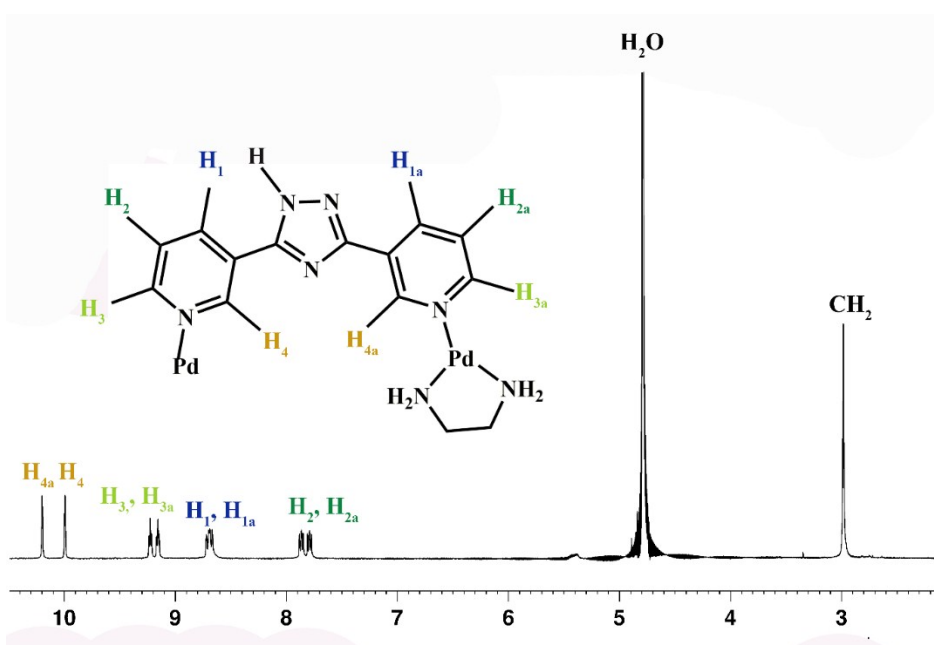

**Figure S3.**  $^1\text{H}$ -NMR spectra of  $[\text{MC-1}](\text{NO}_3)_4$  recorded in  $\text{D}_2\text{O}$ .

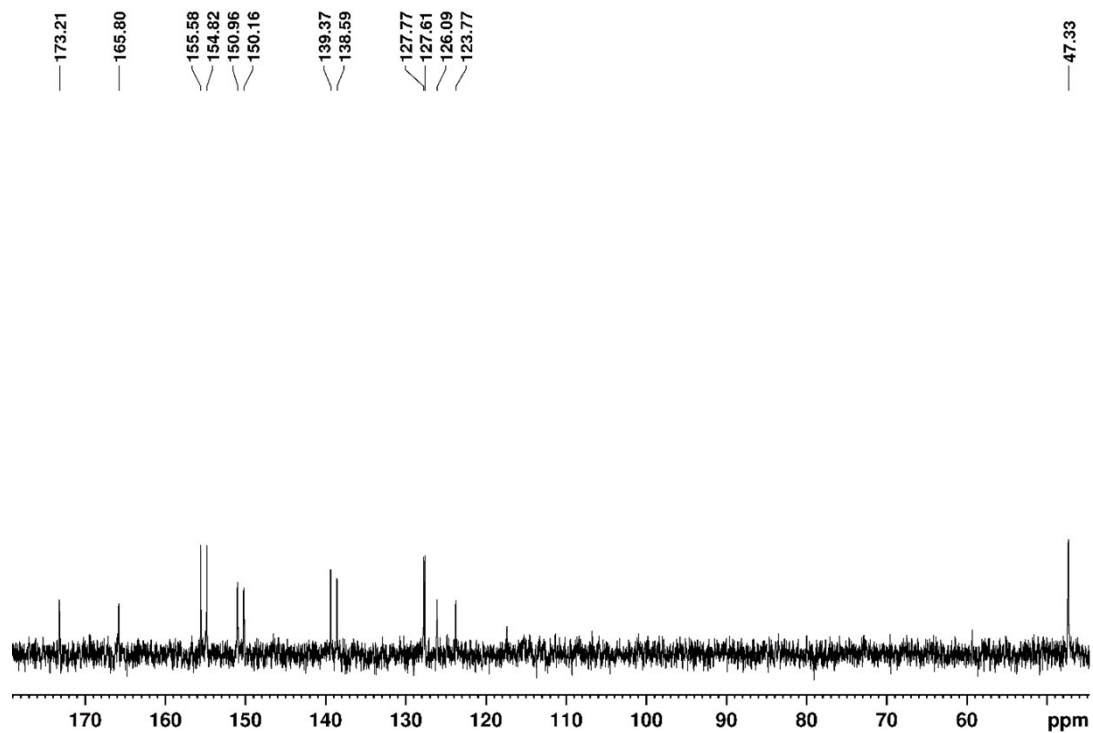

Figure S4.  $^{13}\text{C}$ -NMR spectra of  $[\text{MC-1}](\text{NO}_3)_4$  recorded in  $\text{D}_2\text{O}$ .

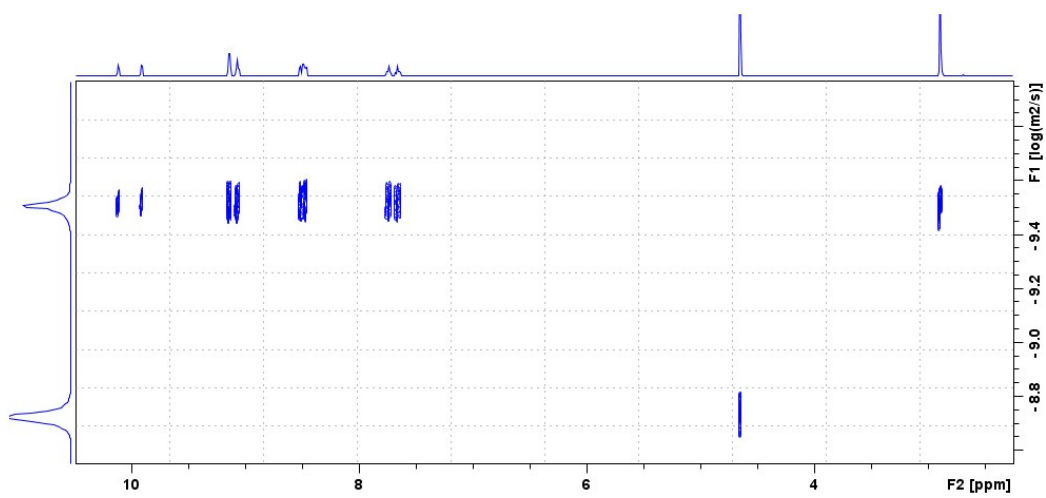

Figure S5.  $^1\text{H}$ -DOSY spectra of  $[\text{MC-1}](\text{NO}_3)_4$  recorded in  $\text{D}_2\text{O}$ .

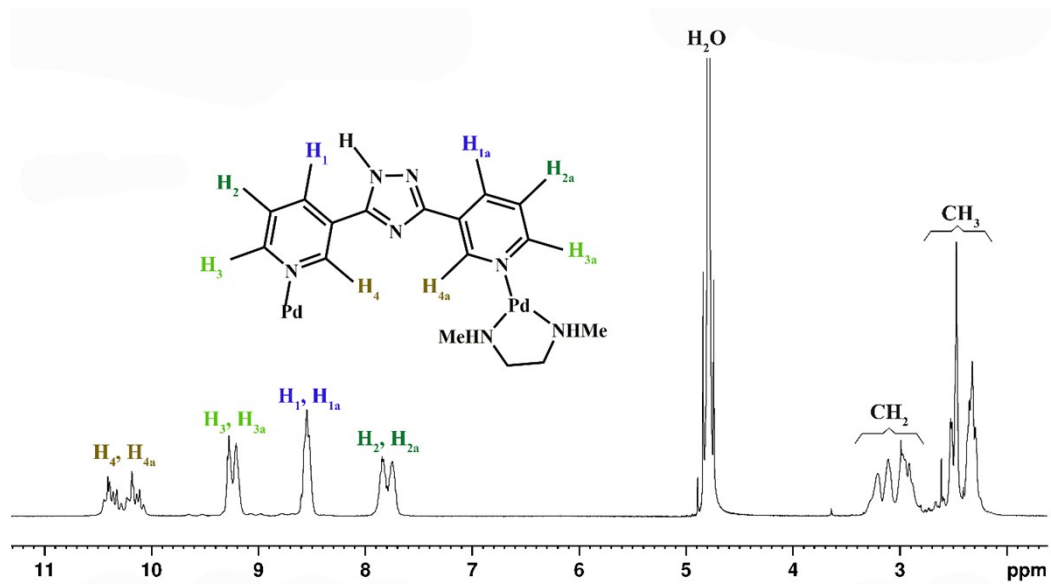

Figure S6.  $^1\text{H-NMR}$  spectra of  $[\text{MC-2}](\text{NO}_3)_4$  recorded in  $\text{D}_2\text{O}$ .

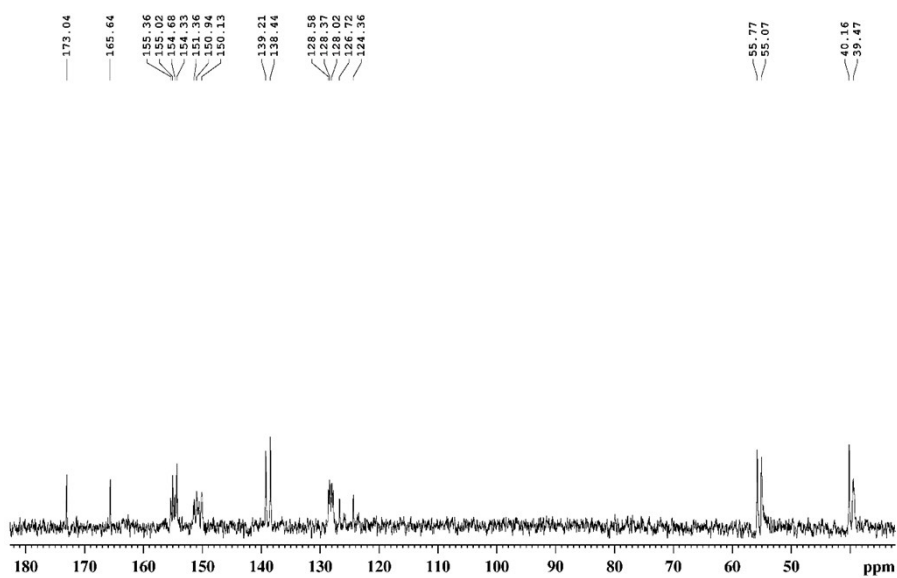

Figure S7.  $^{13}\text{C-NMR}$  spectra of  $[\text{MC-2}](\text{NO}_3)_4$  recorded in  $\text{D}_2\text{O}$ .

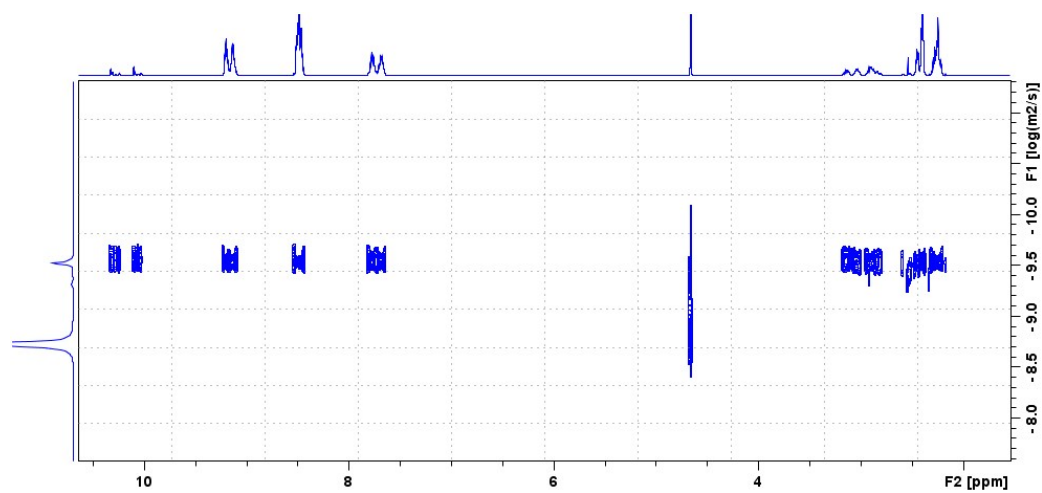

Figure S8.  $^1\text{H-DOSY}$  spectra of  $[\text{MC-2}](\text{NO}_3)_4$  recorded in  $\text{D}_2\text{O}$ .

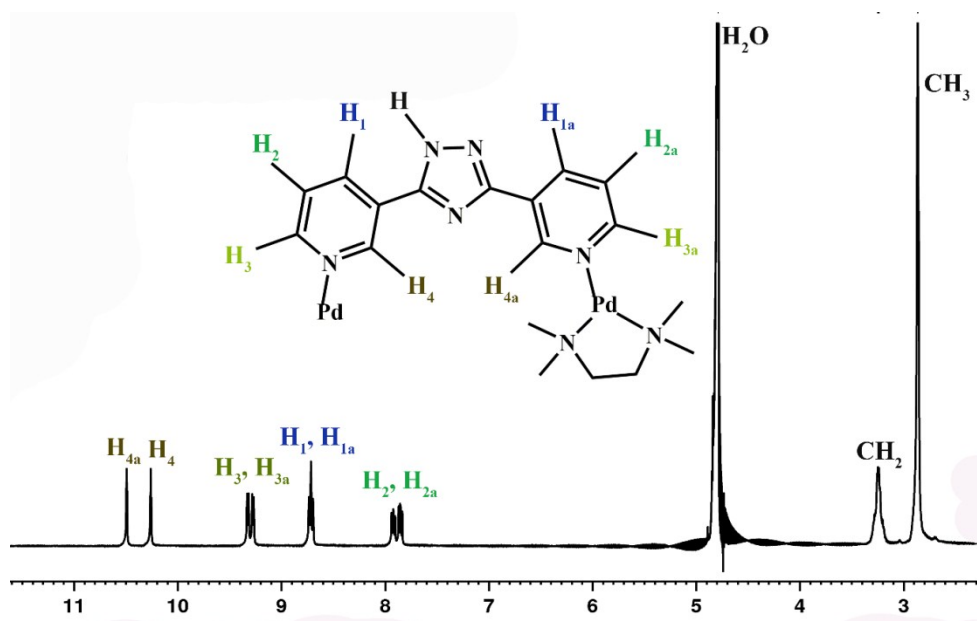

Figure S9. <sup>1</sup>H-NMR spectra of [MC-3](NO<sub>3</sub>)<sub>4</sub> recorded in D<sub>2</sub>O.

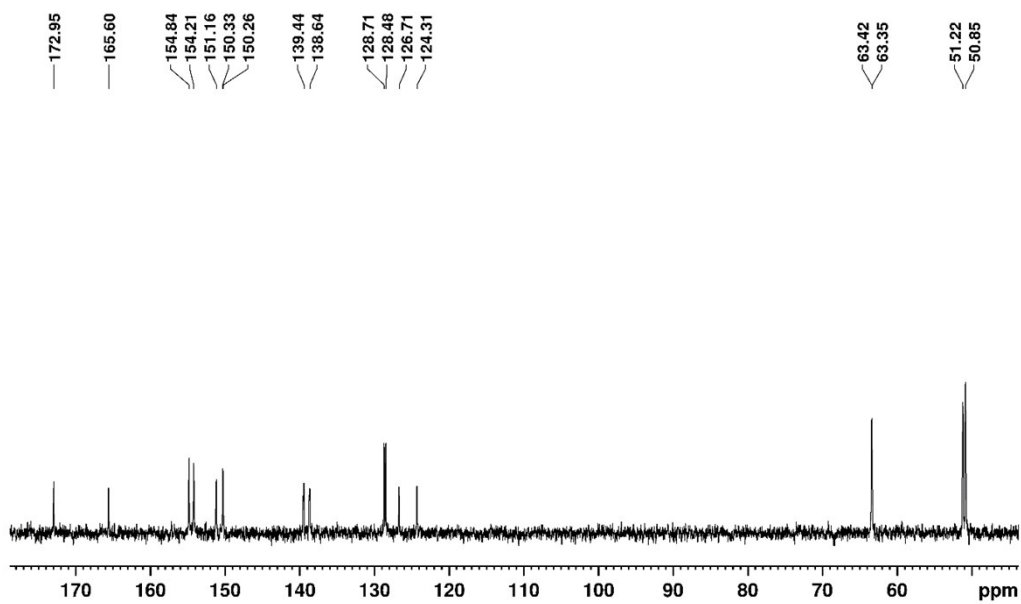

Figure S10. <sup>13</sup>C-NMR spectra of [MC-3](NO<sub>3</sub>)<sub>4</sub> recorded in D<sub>2</sub>O.

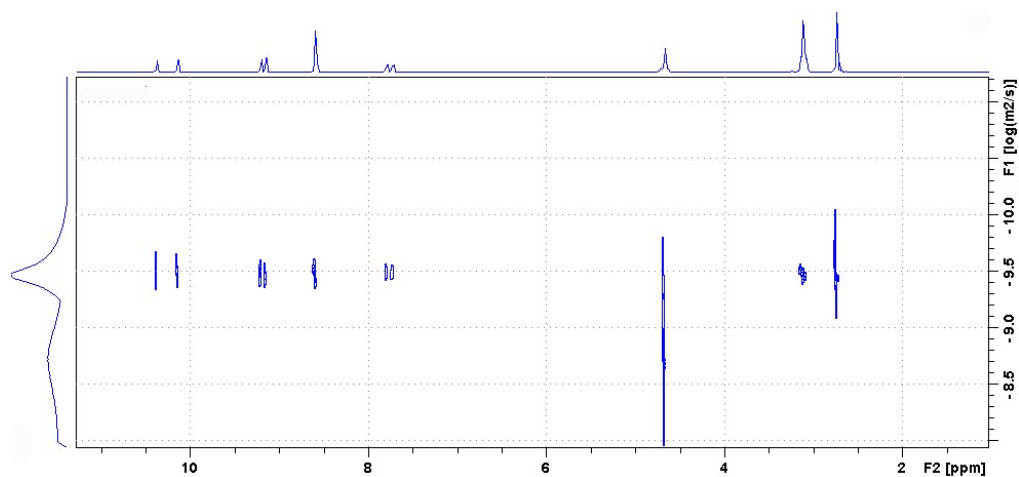

Figure S11.  $^1\text{H}$ -DOSY spectra of  $[\text{MC-3}](\text{NO}_3)_4$  recorded in  $\text{D}_2\text{O}$ .

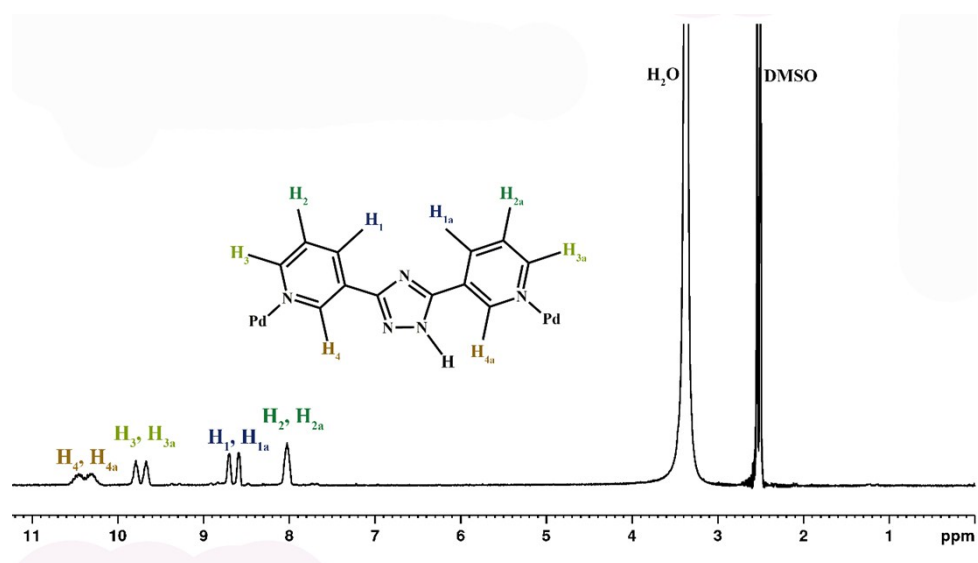

Figure S12.  $^1\text{H}$ -NMR spectra of  $[\text{CG-1}](\text{NO}_3)_{12}$  recorded in  $\text{DMSO-d}_6$ .

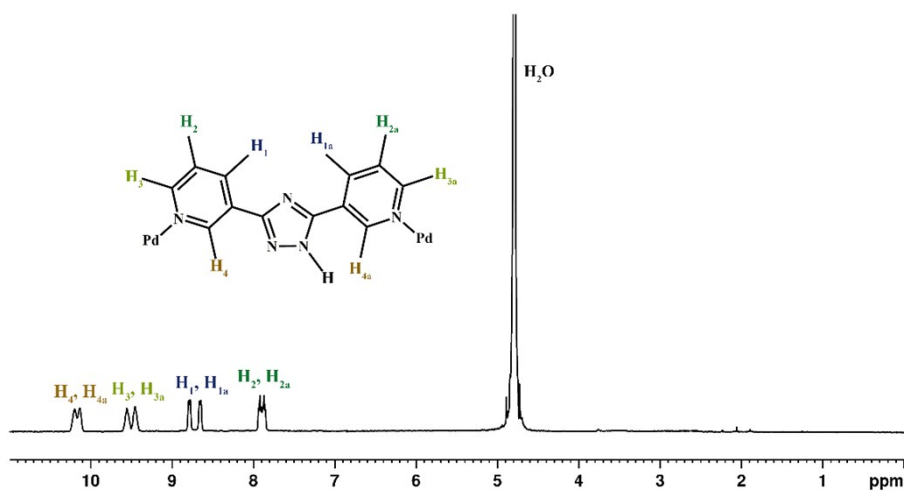

Figure S13.  $^1\text{H}$ -NMR spectra of  $[\text{CG-1}](\text{NO}_3)_{12}$  recorded in  $\text{D}_2\text{O}$ .



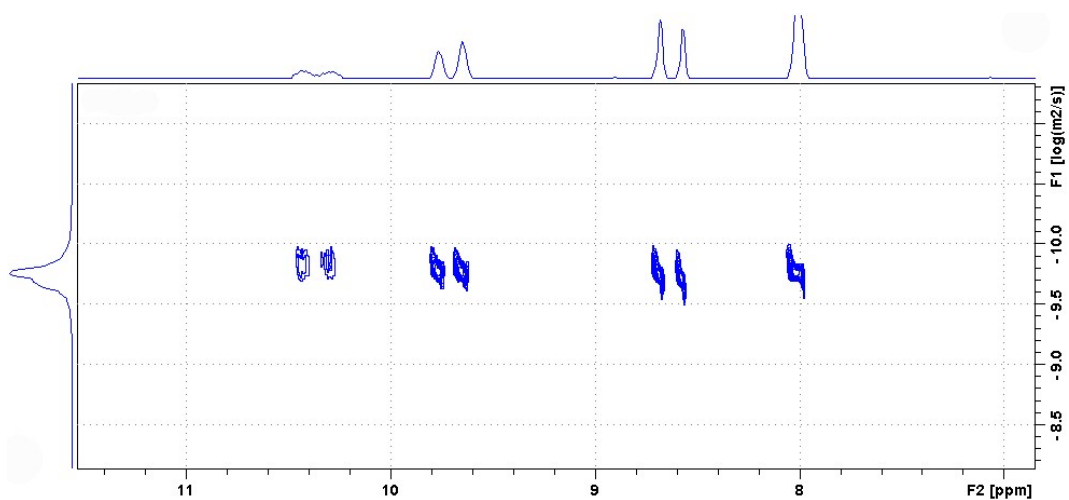

Figure S14.  $^1\text{H}$ -DOSY spectra of  $[\text{CG-1}](\text{NO}_3)_{12}$  recorded in  $\text{DMSO-d}_6$ .

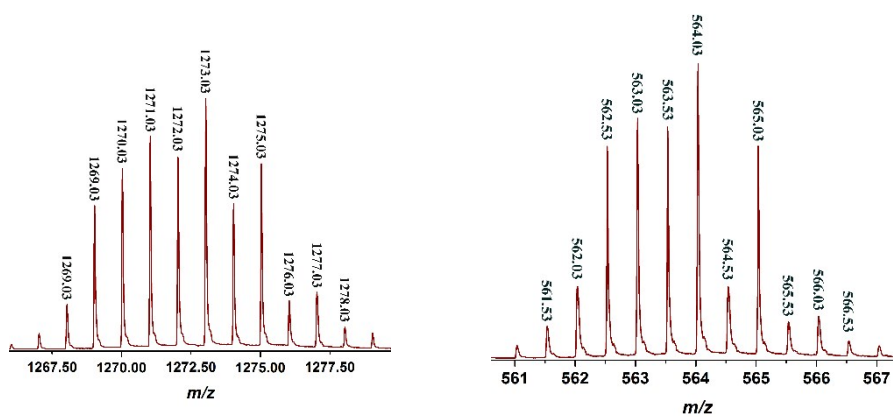

Figure S15. ESI-MS spectra of  $[\text{MC-2}](\text{PF}_6)_4$ ,  $[\text{MC-2-PF}_6]^+$  (left) and  $[\text{MC-2-2PF}_6]^{2+}$ .

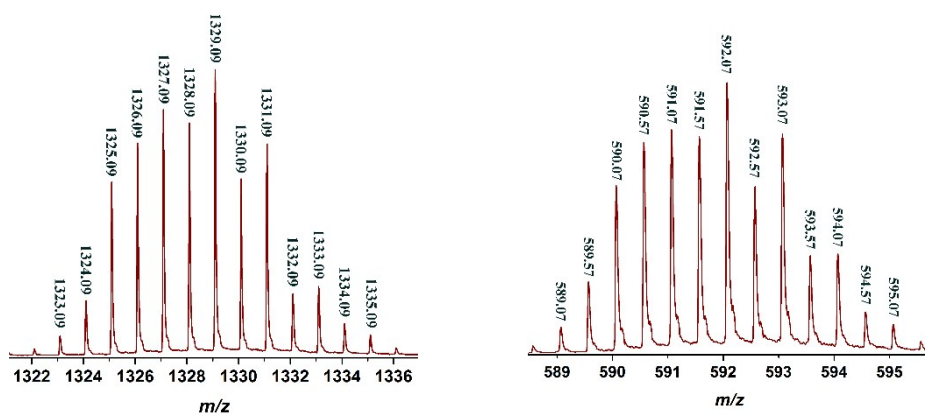

Figure S16. ESI-MS spectra of  $[\text{MC-3}](\text{PF}_6)_4$ ,  $[\text{MC-3-PF}_6]^+$  (left) and  $[\text{MC-3-2PF}_6]^{2+}$ .

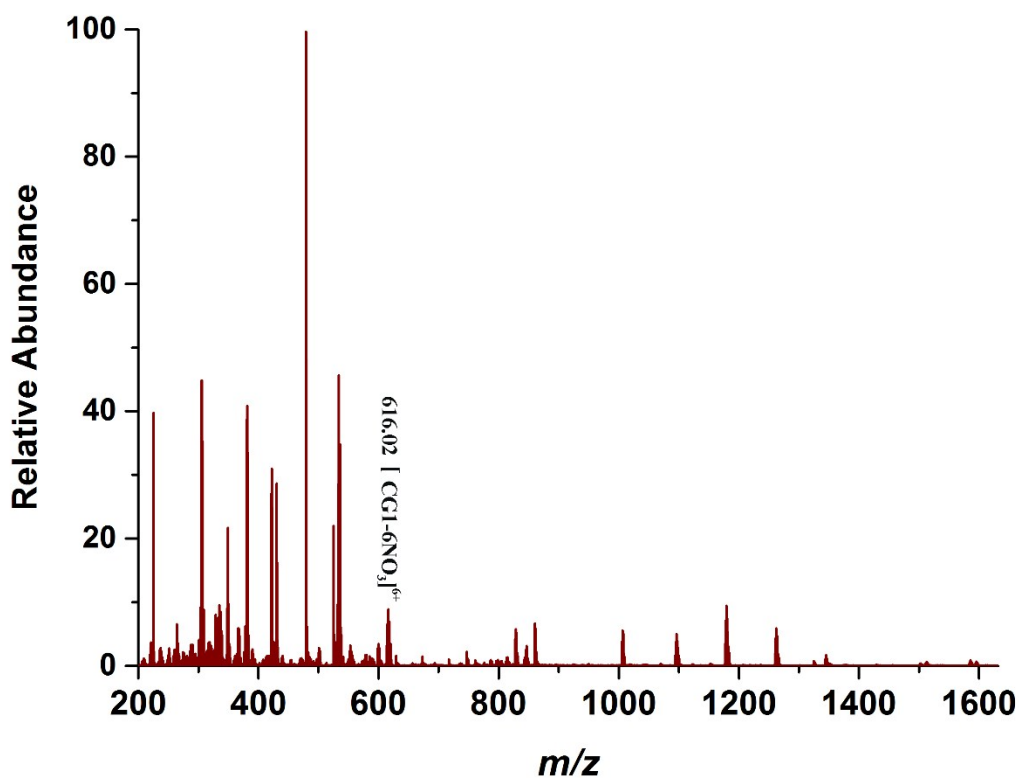

Figure S17. ESI-MS spectra of the cage [CG-1](NO<sub>3</sub>)<sub>12</sub> ([CG-1-6NO<sub>3</sub>]<sup>6+</sup>).

### Computed Geometry and Energy for [MC-1<sub>1</sub>]<sup>4+</sup>

Energy = - 2106.07183612 a.u.

| Center Number | Atomic Number | Atomic Type | Coordinates (Angstroms) |           |           |
|---------------|---------------|-------------|-------------------------|-----------|-----------|
|               |               |             | X                       | Y         | Z         |
| 1             | 46            | 0           | -4.080825               | -0.058429 | 1.228177  |
| 2             | 46            | 0           | 4.111777                | 0.020738  | 1.167537  |
| 3             | 6             | 0           | -1.106918               | 3.171275  | -1.688127 |
| 4             | 6             | 0           | -2.412879               | -2.798224 | -1.579314 |
| 5             | 7             | 0           | 3.871251                | 1.488161  | -0.232092 |
| 6             | 7             | 0           | -3.939218               | 1.450390  | -0.130440 |
| 7             | 7             | 0           | 4.263576                | -1.407498 | 2.600458  |
| 8             | 1             | 0           | 4.815190                | -2.172602 | 2.268285  |
| 9             | 7             | 0           | 3.845067                | -1.382417 | -0.280978 |
| 10            | 7             | 0           | -0.075031               | 2.607397  | -1.131157 |
| 11            | 7             | 0           | 0.005396                | -2.655212 | -1.201056 |
| 12            | 7             | 0           | 0.704160                | -3.961443 | -2.827507 |
| 13            | 7             | 0           | 4.526159                | 1.306578  | 2.678370  |
| 14            | 1             | 0           | 5.436229                | 1.701437  | 2.552434  |
| 15            | 7             | 0           | -3.830697               | -1.421524 | -0.262674 |
| 16            | 7             | 0           | -4.052343               | -1.558631 | 2.627544  |
| 17            | 1             | 0           | -4.566214               | -2.355941 | 2.310947  |
| 18            | 7             | 0           | 0.601856                | 4.021987  | -2.680512 |
| 19            | 7             | 0           | -0.705373               | -3.961790 | -2.843631 |
| 20            | 7             | 0           | -0.810822               | 4.045133  | -2.629280 |
| 21            | 7             | 0           | -4.436408               | 1.193086  | 2.790891  |
| 22            | 1             | 0           | -5.371285               | 1.545781  | 2.750746  |
| 23            | 6             | 0           | 0.949616                | 3.178635  | -1.728632 |
| 24            | 6             | 0           | -2.510805               | 2.871233  | -1.382357 |
| 25            | 6             | 0           | -1.025538               | -3.156061 | -1.842989 |
| 26            | 6             | 0           | 2.620898                | -1.825222 | -0.578868 |
| 27            | 1             | 0           | 1.890749                | -1.473436 | -0.123372 |

|    |   |   |           |           |           |
|----|---|---|-----------|-----------|-----------|
| 28 | 6 | 0 | 2.372948  | 2.860821  | -1.438524 |
| 29 | 6 | 0 | 1.052904  | -3.162064 | -1.842953 |
| 30 | 6 | 0 | -3.518464 | -3.304813 | -2.240021 |
| 31 | 1 | 0 | -3.416306 | -3.957748 | -2.894731 |
| 32 | 6 | 0 | 2.611598  | 1.850647  | -0.568080 |
| 33 | 1 | 0 | 1.892959  | 1.392604  | -0.194850 |
| 34 | 6 | 0 | 3.522477  | -3.311741 | -2.202261 |
| 35 | 1 | 0 | 3.412079  | -3.962396 | -2.856908 |
| 36 | 6 | 0 | -2.728716 | 1.833775  | -0.475752 |
| 37 | 1 | 0 | -1.995773 | 1.398663  | -0.101859 |
| 38 | 6 | 0 | 4.903495  | -1.911413 | -0.926051 |
| 39 | 1 | 0 | 5.755246  | -1.612059 | -0.703039 |
| 40 | 6 | 0 | 2.409966  | -2.796596 | -1.552524 |
| 41 | 6 | 0 | 3.425164  | 3.524388  | -2.036355 |
| 42 | 1 | 0 | 3.273014  | 4.222771  | -2.630273 |
| 43 | 6 | 0 | -3.593879 | 3.497673  | -1.932064 |
| 44 | 1 | 0 | -3.471302 | 4.185713  | -2.544851 |
| 45 | 6 | 0 | 4.712919  | 3.119911  | -1.730825 |
| 46 | 1 | 0 | 5.445636  | 3.523950  | -2.136119 |
| 47 | 6 | 0 | 4.784058  | -2.869718 | -1.891422 |
| 48 | 1 | 0 | 5.531291  | -3.209819 | -2.325233 |
| 49 | 6 | 0 | -2.626258 | -1.849004 | -0.577913 |
| 50 | 1 | 0 | -1.892828 | -1.507321 | -0.119272 |
| 51 | 6 | 0 | -4.769718 | -2.835648 | -1.919682 |
| 52 | 1 | 0 | -5.514122 | -3.153794 | -2.376297 |
| 53 | 6 | 0 | 4.880129  | 2.121469  | -0.825649 |
| 54 | 1 | 0 | 5.748176  | 1.867435  | -0.608742 |
| 55 | 6 | 0 | -4.921479 | -1.912392 | -0.940755 |
| 56 | 1 | 0 | -5.772562 | -1.607935 | -0.724793 |
| 57 | 6 | 0 | -5.006263 | 2.088823  | -0.709824 |
| 58 | 1 | 0 | -5.866640 | 1.805233  | -0.497635 |
| 59 | 6 | 0 | -4.851848 | 3.111432  | -1.580630 |
| 60 | 1 | 0 | -5.594202 | 3.547113  | -1.933297 |
| 61 | 6 | 0 | 4.473731  | 0.552523  | 3.941896  |
| 62 | 1 | 0 | 5.027385  | 0.999627  | 4.602686  |
| 63 | 1 | 0 | 3.561211  | 0.549653  | 4.272586  |
| 64 | 6 | 0 | 4.915524  | -0.779691 | 3.794238  |
| 65 | 1 | 0 | 4.695263  | -1.286714 | 4.590884  |
| 66 | 1 | 0 | 5.879211  | -0.791540 | 3.684605  |
| 67 | 6 | 0 | -4.682821 | -0.960712 | 3.851529  |
| 68 | 1 | 0 | -5.649263 | -0.989474 | 3.771071  |
| 69 | 1 | 0 | -4.428012 | -1.470390 | 4.636748  |
| 70 | 6 | 0 | -4.239526 | 0.422169  | 3.993368  |
| 71 | 1 | 0 | -4.726892 | 0.838163  | 4.721035  |
| 72 | 1 | 0 | -3.297591 | 0.430804  | 4.224914  |
| 73 | 1 | 0 | 1.313881  | -4.465553 | -3.439155 |
| 74 | 1 | 0 | -1.438860 | 4.596019  | -3.178909 |
| 75 | 1 | 0 | 3.853699  | 2.046572  | 2.692742  |
| 76 | 1 | 0 | 3.356282  | -1.750840 | 2.843221  |
| 77 | 1 | 0 | -3.807423 | 1.970128  | 2.766747  |
| 78 | 1 | 0 | -3.116926 | -1.858665 | 2.814558  |

## Computed Geometry and Energy for [MC-1<sub>II</sub>]<sup>4+</sup>

Energy = - 2105.90879335 a.u.

| Center<br>Number | Atomic<br>Number | Atomic<br>Type | Coordinates (Angstroms) |           |           |
|------------------|------------------|----------------|-------------------------|-----------|-----------|
|                  |                  |                | X                       | Y         | Z         |
| 1                | 46               | 0              | 6.073261                | 0.007595  | -0.409996 |
| 2                | 7                | 0              | 7.343422                | -1.369689 | -1.196048 |
| 3                | 7                | 0              | 4.828179                | -1.446332 | 0.359013  |
| 4                | 7                | 0              | 0.647120                | -1.813514 | -1.242296 |
| 5                | 7                | 0              | 0.006100                | -2.856772 | 0.716856  |
| 6                | 7                | 0              | 7.343983                | 1.387407  | -1.192044 |
| 7                | 6                | 0              | 5.162900                | -2.076517 | 1.610558  |
| 8                | 6                | 0              | 4.181452                | -2.930959 | 2.285709  |
| 9                | 6                | 0              | 2.843270                | -3.094544 | 1.706073  |

|    |    |   |           |           |           |
|----|----|---|-----------|-----------|-----------|
| 10 | 6  | 0 | 2.502806  | -2.440379 | 0.429653  |
| 11 | 6  | 0 | 3.554639  | -1.683381 | -0.274135 |
| 12 | 6  | 0 | 1.108671  | -2.454419 | -0.062460 |
| 13 | 7  | 0 | -0.742986 | -1.774625 | -1.297488 |
| 14 | 6  | 0 | -1.111711 | -2.433007 | -0.054913 |
| 15 | 46 | 0 | -6.080266 | -0.008710 | -0.399356 |
| 16 | 7  | 0 | -7.354189 | 1.352388  | -1.206319 |
| 17 | 7  | 0 | 4.832502  | 1.447940  | 0.354538  |
| 18 | 7  | 0 | -4.847078 | 1.459763  | 0.323185  |
| 19 | 7  | 0 | 0.706417  | 1.714885  | -1.247358 |
| 20 | 7  | 0 | -0.661418 | 1.724949  | -1.261793 |
| 21 | 7  | 0 | -0.007954 | 2.879663  | 0.657352  |
| 22 | 6  | 0 | 5.164068  | 2.068549  | 1.600644  |
| 23 | 6  | 0 | 4.180478  | 2.923447  | 2.287583  |
| 24 | 6  | 0 | 2.836939  | 3.089151  | 1.708552  |
| 25 | 6  | 0 | 2.507597  | 2.433343  | 0.426187  |
| 26 | 6  | 0 | 3.568326  | 1.680055  | -0.276589 |
| 27 | 6  | 0 | 1.122682  | 2.426406  | -0.085602 |
| 28 | 6  | 0 | -1.121079 | 2.428842  | -0.111221 |
| 29 | 6  | 0 | -2.518583 | 2.442769  | 0.377449  |
| 30 | 6  | 0 | -2.859460 | 3.138713  | 1.636457  |
| 31 | 6  | 0 | -4.207877 | 2.996924  | 2.209746  |
| 32 | 6  | 0 | -5.187540 | 2.121848  | 1.544720  |
| 33 | 6  | 0 | -3.580229 | 1.672427  | -0.309184 |
| 34 | 6  | 0 | 8.256500  | -0.700143 | -2.116722 |
| 35 | 6  | 0 | 8.573636  | 0.718663  | -1.605986 |
| 36 | 1  | 0 | 6.127375  | -1.886912 | 2.069303  |
| 37 | 1  | 0 | 4.428969  | -3.404616 | 3.229905  |
| 38 | 1  | 0 | 2.103969  | -3.684667 | 2.238384  |
| 39 | 1  | 0 | 3.360053  | -1.220393 | -1.232625 |
| 40 | 1  | 0 | -1.235542 | 1.243444  | -1.994390 |
| 41 | 1  | 0 | 6.131215  | 1.875500  | 2.059207  |
| 42 | 1  | 0 | 4.430162  | 3.392247  | 3.237017  |
| 43 | 1  | 0 | 2.089904  | 3.672961  | 2.243045  |
| 44 | 1  | 0 | 3.364292  | 1.215791  | -1.238448 |
| 45 | 1  | 0 | -2.117091 | 3.739702  | 2.158093  |
| 46 | 1  | 0 | -4.464527 | 3.500461  | 3.139306  |
| 47 | 1  | 0 | -6.159720 | 1.948055  | 2.000237  |
| 48 | 1  | 0 | -3.385477 | 1.184299  | -1.258668 |
| 49 | 1  | 0 | 1.247071  | -1.395368 | -1.992699 |
| 50 | 1  | 0 | 6.792234  | -2.124747 | -1.673363 |
| 51 | 1  | 0 | 7.860042  | -1.832028 | -0.407751 |
| 52 | 1  | 0 | 9.196579  | -1.289631 | -2.227883 |
| 53 | 1  | 0 | 7.773150  | -0.617455 | -3.118465 |
| 54 | 1  | 0 | 9.259844  | 0.635978  | -0.730657 |
| 55 | 1  | 0 | 9.087516  | 1.308866  | -2.400495 |
| 56 | 1  | 0 | 6.867096  | 1.855253  | -2.001671 |
| 57 | 1  | 0 | 7.529535  | 2.138256  | -0.482435 |
| 58 | 1  | 0 | -7.575331 | 2.092653  | -0.495996 |
| 59 | 1  | 0 | -6.864187 | 1.837747  | -1.997727 |
| 60 | 7  | 0 | -4.821376 | -1.434088 | 0.399856  |
| 61 | 6  | 0 | -2.488548 | -2.420218 | 0.473469  |
| 62 | 6  | 0 | -2.804643 | -3.036108 | 1.777378  |
| 63 | 6  | 0 | -3.552221 | -1.688570 | -0.241742 |
| 64 | 6  | 0 | -5.138634 | -2.026052 | 1.678048  |
| 65 | 6  | 0 | -4.141447 | -2.858942 | 2.370823  |
| 66 | 7  | 0 | -7.348272 | -1.440930 | -1.145232 |
| 67 | 6  | 0 | -8.183897 | -0.748474 | -2.146295 |
| 68 | 6  | 0 | -8.553745 | 0.662122  | -1.659269 |
| 69 | 1  | 0 | -3.357662 | -1.251623 | -1.218316 |
| 70 | 1  | 0 | -6.100211 | -1.823664 | 2.144351  |
| 71 | 1  | 0 | -4.375966 | -3.305107 | 3.334957  |
| 72 | 1  | 0 | -2.051706 | -3.605068 | 2.319775  |
| 73 | 1  | 0 | -7.957855 | -1.820302 | -0.358813 |
| 74 | 1  | 0 | -6.796078 | -2.227076 | -1.604116 |
| 75 | 1  | 0 | -9.109825 | -1.337090 | -2.344982 |
| 76 | 1  | 0 | -7.615264 | -0.658892 | -3.101404 |
| 77 | 1  | 0 | -9.272972 | 0.572288  | -0.811540 |
| 78 | 1  | 0 | -9.044626 | 1.235866  | -2.480088 |

-----

**Computed Geometry and Energy for [MC-1<sub>III</sub>]<sup>4+</sup>**

Energy = - 2105.89553418 a.u.

| Center<br>Number | Atomic<br>Number | Atomic<br>Type | Coordinates (Angstroms) |           |           |
|------------------|------------------|----------------|-------------------------|-----------|-----------|
|                  |                  |                | X                       | Y         | Z         |
| 1                | 46               | 0              | -5.855046               | -0.021502 | 0.211170  |
| 2                | 7                | 0              | -7.276091               | 1.363683  | -0.314887 |
| 3                | 7                | 0              | -4.507116               | 1.450951  | 0.721368  |
| 4                | 7                | 0              | -1.049345               | 2.656970  | -1.959576 |
| 5                | 7                | 0              | 0.341092                | 2.468531  | -0.043072 |
| 6                | 7                | 0              | -7.220123               | -1.468203 | -0.293223 |
| 7                | 6                | 0              | -4.484663               | 1.924676  | 2.082555  |
| 8                | 6                | 0              | -3.300194               | 2.615449  | 2.600997  |
| 9                | 6                | 0              | -2.133666               | 2.799238  | 1.732078  |
| 10               | 6                | 0              | -2.191678               | 2.379051  | 0.322654  |
| 11               | 6                | 0              | -3.420045               | 1.741324  | -0.181341 |
| 12               | 6                | 0              | -1.006923               | 2.508062  | -0.535872 |
| 13               | 7                | 0              | 0.264960                | 2.737362  | -2.421676 |
| 14               | 6                | 0              | 1.099688                | 2.614075  | -1.258115 |
| 15               | 7                | 0              | -4.450321               | -1.434467 | 0.736863  |
| 16               | 6                | 0              | 4.761792                | -2.586737 | -2.722003 |
| 17               | 7                | 0              | -1.068544               | -2.499815 | -2.026210 |
| 18               | 7                | 0              | 0.245582                | -2.582972 | -2.488959 |
| 19               | 7                | 0              | 0.377343                | -2.545492 | -0.118927 |
| 20               | 6                | 0              | -4.384849               | -1.865699 | 2.110462  |
| 21               | 6                | 0              | -3.186095               | -2.544482 | 2.611773  |
| 22               | 6                | 0              | -2.048853               | -2.760532 | 1.711419  |
| 23               | 6                | 0              | -2.141283               | -2.360335 | 0.297177  |
| 24               | 6                | 0              | -3.385756               | -1.739572 | -0.187622 |
| 25               | 6                | 0              | -0.980537               | -2.498724 | -0.592309 |
| 26               | 6                | 0              | 1.115507                | -2.598637 | -1.349784 |
| 27               | 6                | 0              | 2.574583                | -2.432631 | -1.426998 |
| 28               | 6                | 0              | 3.302303                | -1.769974 | -0.330764 |
| 29               | 7                | 0              | 4.696907                | -1.436115 | -0.482609 |
| 30               | 6                | 0              | 5.440054                | -1.866030 | -1.640002 |
| 31               | 6                | 0              | 3.320247                | -2.843408 | -2.629039 |
| 32               | 6                | 0              | -8.312168               | 0.610060  | -1.041818 |
| 33               | 6                | 0              | -8.511340               | -0.768218 | -0.399571 |
| 34               | 6                | 0              | 4.751426                | 2.708342  | -2.598540 |
| 35               | 6                | 0              | 2.560930                | 2.473858  | -1.322480 |
| 36               | 6                | 0              | 3.288457                | 1.763203  | -0.256411 |
| 37               | 6                | 0              | 3.306869                | 2.945037  | -2.501259 |
| 38               | 6                | 0              | 5.432131                | 1.945602  | -1.547093 |
| 39               | 7                | 0              | 4.687991                | 1.453265  | -0.415235 |
| 40               | 1                | 0              | -5.309012               | 1.691742  | 2.747204  |
| 41               | 1                | 0              | -3.267404               | 2.942760  | 3.634879  |
| 42               | 1                | 0              | -1.237823               | 3.264123  | 2.131884  |
| 43               | 1                | 0              | -3.458595               | 1.352173  | -1.193142 |
| 44               | 1                | 0              | 0.525513                | -2.517779 | -3.512140 |
| 45               | 1                | 0              | -5.191840               | -1.616818 | 2.790653  |
| 46               | 1                | 0              | -3.124194               | -2.846491 | 3.652190  |
| 47               | 1                | 0              | -1.148392               | -3.230052 | 2.094660  |
| 48               | 1                | 0              | -3.457615               | -1.384730 | -1.210481 |
| 49               | 1                | 0              | 2.768334                | -1.414248 | 0.544584  |
| 50               | 1                | 0              | 6.487200                | -1.600386 | -1.736867 |
| 51               | 1                | 0              | 2.818871                | -3.356161 | -3.443551 |
| 52               | 1                | 0              | -1.911631               | 2.736299  | -2.575516 |
| 53               | 1                | 0              | -6.854820               | 2.113722  | -0.942008 |
| 54               | 1                | 0              | -7.689308               | 1.799728  | 0.564161  |
| 55               | 1                | 0              | -9.273018               | 1.175789  | -1.034472 |
| 56               | 1                | 0              | -7.995624               | 0.470993  | -2.101704 |
| 57               | 1                | 0              | -8.944783               | -0.632993 | 0.618857  |
| 58               | 1                | 0              | -9.224711               | -1.371843 | -1.007583 |
| 59               | 1                | 0              | -6.955721               | -1.897632 | -1.230829 |
| 60               | 1                | 0              | -7.266729               | -2.216595 | 0.462462  |
| 61               | 1                | 0              | 2.797268                | 3.473399  | -3.301028 |
| 62               | 1                | 0              | 6.481190                | 1.691436  | -1.653168 |
| 63               | 1                | 0              | 2.751396                | 1.353139  | 0.592894  |
| 64               | 46               | 0              | 5.521903                | -0.017217 | 0.763686  |
| 65               | 7                | 0              | 6.358939                | 1.372925  | 2.021132  |
| 66               | 6                | 0              | 7.330389                | 0.628032  | 2.840499  |
| 67               | 6                | 0              | 6.775405                | -0.759600 | 3.185676  |
| 68               | 7                | 0              | 6.363965                | -1.459617 | 1.956998  |
| 69               | 1                | 0              | 7.214306                | -1.874244 | 1.468106  |
| 70               | 1                | 0              | 5.653874                | -2.219785 | 2.183858  |
| 71               | 1                | 0              | 7.548576                | -1.355563 | 3.724729  |

|    |   |   |          |           |           |
|----|---|---|----------|-----------|-----------|
| 72 | 1 | 0 | 5.893112 | -0.638898 | 3.857146  |
| 73 | 1 | 0 | 8.280335 | 0.504234  | 2.269313  |
| 74 | 1 | 0 | 7.554005 | 1.192087  | 3.775968  |
| 75 | 1 | 0 | 5.601885 | 1.794283  | 2.640271  |
| 76 | 1 | 0 | 6.852725 | 2.132936  | 1.462441  |
| 77 | 1 | 0 | 5.316088 | -2.897108 | -3.601642 |
| 78 | 1 | 0 | 5.304054 | 3.055937  | -3.465028 |

## Computed Geometry and Energy for [CG-1]<sup>12+</sup>

Energy = - 9591.43852287 a.u.

| Center<br>Number | Atomic<br>Number | Atomic<br>Type | Coordinates (Angstroms) |           |           |
|------------------|------------------|----------------|-------------------------|-----------|-----------|
|                  |                  |                | X                       | Y         | Z         |
| 1                | 46               | 0              | 6.204579                | 6.180600  | 0.000000  |
| 2                | 46               | 0              | 0.000000                | 0.000000  | 8.635188  |
| 3                | 7                | 0              | 6.224590                | 6.161800  | 2.051246  |
| 4                | 7                | 0              | 1.453953                | 1.412200  | 8.657391  |
| 5                | 7                | 0              | 3.782102                | 3.555300  | 4.120240  |
| 6                | 7                | 0              | 3.057600                | 2.860300  | 5.124898  |
| 7                | 1                | 0              | 2.464974                | 2.247900  | 5.018620  |
| 8                | 7                | 0              | 4.360091                | 4.313800  | 6.105372  |
| 9                | 7                | 0              | 4.778769                | 7.571300  | 0.000000  |
| 10               | 7                | 0              | 0.705268                | 6.484500  | 0.000000  |
| 11               | 7                | 0              | 0.000000                | 8.561500  | 0.000000  |
| 12               | 7                | 0              | 7.612429                | 4.727600  | 0.000000  |
| 13               | 7                | 0              | 6.533667                | 0.719900  | 0.000000  |
| 14               | 7                | 0              | 8.655836                | 0.000000  | 0.000000  |
| 15               | 6                | 0              | 7.085917                | 6.939600  | 2.693653  |
| 16               | 1                | 0              | 7.617308                | 7.527100  | 2.207375  |
| 17               | 6                | 0              | 7.214752                | 6.892700  | 4.068692  |
| 18               | 1                | 0              | 7.850794                | 7.403000  | 4.514665  |
| 19               | 6                | 0              | 6.363042                | 6.059800  | 4.746454  |
| 20               | 1                | 0              | 6.408155                | 6.015600  | 5.673896  |
| 21               | 6                | 0              | 5.443662                | 5.290200  | 4.071874  |
| 22               | 6                | 0              | 5.416297                | 5.392300  | 2.701714  |
| 23               | 1                | 0              | 4.794820                | 4.890300  | 2.225194  |
| 24               | 6                | 0              | 4.525908                | 4.382800  | 4.806063  |
| 25               | 6                | 0              | 3.497067                | 3.354000  | 6.231025  |
| 26               | 6                | 0              | 2.951322                | 2.865800  | 7.511030  |
| 27               | 6                | 0              | 3.455277                | 3.279500  | 8.675140  |
| 28               | 1                | 0              | 4.128231                | 3.919400  | 8.681574  |
| 29               | 6                | 0              | 2.973808                | 2.755400  | 9.900343  |
| 30               | 1                | 0              | 3.328069                | 3.031300  | 10.715072 |
| 31               | 6                | 0              | 1.975586                | 1.839700  | 9.842431  |
| 32               | 1                | 0              | 1.639074                | 1.492200  | 10.636159 |
| 33               | 6                | 0              | 1.944968                | 1.900400  | 7.531960  |
| 34               | 1                | 0              | 1.605274                | 1.588700  | 6.725293  |
| 35               | 6                | 0              | 5.049167                | 8.867600  | 0.000000  |
| 36               | 1                | 0              | 5.941253                | 9.129600  | 0.000000  |
| 37               | 6                | 0              | 4.063884                | 9.877100  | 0.000000  |
| 38               | 1                | 0              | 4.276440                | 10.784600 | 0.000000  |
| 39               | 6                | 0              | 2.798304                | 9.433000  | 0.000000  |
| 40               | 1                | 0              | 2.118916                | 10.067400 | 0.000000  |
| 41               | 6                | 0              | 2.460166                | 8.180800  | 0.000000  |
| 42               | 6                | 0              | 3.445590                | 7.256800  | 0.000000  |
| 43               | 1                | 0              | 3.207295                | 6.357700  | 0.000000  |
| 44               | 6                | 0              | 1.040154                | 7.747800  | 0.000000  |
| 45               | 6                | 0              | 8.955225                | 5.064100  | 0.000000  |
| 46               | 1                | 0              | 9.229016                | 5.955000  | 0.000000  |
| 47               | 6                | 0              | 9.824683                | 4.095900  | 0.000000  |
| 48               | 1                | 0              | 10.719880               | 4.338600  | 0.000000  |
| 49               | 6                | 0              | 9.554285                | 2.794100  | 0.000000  |
| 50               | 1                | 0              | 10.224057               | 2.151400  | 0.000000  |
| 51               | 6                | 0              | 8.208237                | 2.463100  | 0.000000  |
| 52               | 6                | 0              | 7.261421                | 3.461500  | 0.000000  |
| 53               | 1                | 0              | 6.359860                | 3.235400  | 0.000000  |

|     |    |   |            |           |            |
|-----|----|---|------------|-----------|------------|
| 54  | 6  | 0 | 7.808863   | 1.114300  | 0.000000   |
| 55  | 7  | 0 | -4.778769  | 7.571300  | 0.000000   |
| 56  | 7  | 0 | -0.705268  | 6.484500  | 0.000000   |
| 57  | 6  | 0 | -5.049167  | 8.867600  | 0.000000   |
| 58  | 1  | 0 | -5.941253  | 9.129600  | 0.000000   |
| 59  | 6  | 0 | -4.063884  | 9.877100  | 0.000000   |
| 60  | 1  | 0 | -4.276440  | 10.784600 | 0.000000   |
| 61  | 6  | 0 | -2.798304  | 9.433000  | 0.000000   |
| 62  | 1  | 0 | -2.118916  | 10.067400 | 0.000000   |
| 63  | 6  | 0 | -2.460166  | 8.180800  | 0.000000   |
| 64  | 6  | 0 | -3.445590  | 7.256800  | 0.000000   |
| 65  | 1  | 0 | -3.207295  | 6.357700  | 0.000000   |
| 66  | 6  | 0 | -1.040154  | 7.747800  | 0.000000   |
| 67  | 7  | 0 | 7.612429   | -4.727600 | 0.000000   |
| 68  | 7  | 0 | 6.533667   | -0.719900 | 0.000000   |
| 69  | 6  | 0 | 8.955225   | -5.064100 | 0.000000   |
| 70  | 1  | 0 | 9.229016   | -5.955000 | 0.000000   |
| 71  | 6  | 0 | 9.824683   | -4.095900 | 0.000000   |
| 72  | 1  | 0 | 10.719880  | -4.338600 | 0.000000   |
| 73  | 6  | 0 | 9.554285   | -2.794100 | 0.000000   |
| 74  | 1  | 0 | 10.224057  | -2.151400 | 0.000000   |
| 75  | 6  | 0 | 8.208237   | -2.463100 | 0.000000   |
| 76  | 6  | 0 | 7.261421   | -3.461500 | 0.000000   |
| 77  | 1  | 0 | 6.359860   | -3.235400 | 0.000000   |
| 78  | 6  | 0 | 7.808863   | -1.114300 | 0.000000   |
| 79  | 46 | 0 | -6.204579  | 6.180600  | 0.000000   |
| 80  | 46 | 0 | 0.000000   | 0.000000  | -8.635188  |
| 81  | 7  | 0 | -6.224590  | 6.161800  | -2.051246  |
| 82  | 7  | 0 | -1.453953  | 1.412200  | -8.657391  |
| 83  | 7  | 0 | -3.782102  | 3.555300  | -4.120240  |
| 84  | 7  | 0 | -3.057600  | 2.860300  | -5.124898  |
| 85  | 1  | 0 | -2.464974  | 2.247900  | -5.018620  |
| 86  | 7  | 0 | -4.360091  | 4.313800  | -6.105372  |
| 87  | 7  | 0 | -7.612429  | 4.727600  | 0.000000   |
| 88  | 7  | 0 | -6.533667  | 0.719900  | 0.000000   |
| 89  | 7  | 0 | -8.655836  | 0.000000  | 0.000000   |
| 90  | 6  | 0 | -7.085917  | 6.939600  | -2.693653  |
| 91  | 1  | 0 | -7.617308  | 7.527100  | -2.207375  |
| 92  | 6  | 0 | -7.214752  | 6.892700  | -4.068692  |
| 93  | 1  | 0 | -7.850794  | 7.403000  | -4.514665  |
| 94  | 6  | 0 | -6.363042  | 6.059800  | -4.746454  |
| 95  | 1  | 0 | -6.408155  | 6.015600  | -5.673896  |
| 96  | 6  | 0 | -5.443662  | 5.290200  | -4.071874  |
| 97  | 6  | 0 | -5.416297  | 5.392300  | -2.701714  |
| 98  | 1  | 0 | -4.794820  | 4.890300  | -2.225194  |
| 99  | 6  | 0 | -4.525908  | 4.382800  | -4.806063  |
| 100 | 6  | 0 | -3.497067  | 3.354000  | -6.231025  |
| 101 | 6  | 0 | -2.951322  | 2.865800  | -7.511030  |
| 102 | 6  | 0 | -3.455277  | 3.279500  | -8.675140  |
| 103 | 1  | 0 | -4.128231  | 3.919400  | -8.681574  |
| 104 | 6  | 0 | -2.973808  | 2.755400  | -9.900343  |
| 105 | 1  | 0 | -3.328069  | 3.031300  | -10.715072 |
| 106 | 6  | 0 | -1.975586  | 1.839700  | -9.842431  |
| 107 | 1  | 0 | -1.639074  | 1.492200  | -10.636159 |
| 108 | 6  | 0 | -1.944968  | 1.900400  | -7.531960  |
| 109 | 1  | 0 | -1.605274  | 1.588700  | -6.725293  |
| 110 | 6  | 0 | -8.955225  | 5.064100  | 0.000000   |
| 111 | 1  | 0 | -9.229016  | 5.955000  | 0.000000   |
| 112 | 6  | 0 | -9.824683  | 4.095900  | 0.000000   |
| 113 | 1  | 0 | -10.719880 | 4.338600  | 0.000000   |
| 114 | 6  | 0 | -9.554285  | 2.794100  | 0.000000   |
| 115 | 1  | 0 | -10.224057 | 2.151400  | 0.000000   |
| 116 | 6  | 0 | -8.208237  | 2.463100  | 0.000000   |
| 117 | 6  | 0 | -7.261421  | 3.461500  | 0.000000   |
| 118 | 1  | 0 | -6.359860  | 3.235400  | 0.000000   |
| 119 | 6  | 0 | -7.808863  | 1.114300  | 0.000000   |
| 120 | 7  | 0 | -7.612429  | -4.727600 | 0.000000   |
| 121 | 7  | 0 | -6.533667  | -0.719900 | 0.000000   |
| 122 | 6  | 0 | -8.955225  | -5.064100 | 0.000000   |
| 123 | 1  | 0 | -9.229016  | -5.955000 | 0.000000   |
| 124 | 6  | 0 | -9.824683  | -4.095900 | 0.000000   |
| 125 | 1  | 0 | -10.719880 | -4.338600 | 0.000000   |
| 126 | 6  | 0 | -9.554285  | -2.794100 | 0.000000   |
| 127 | 1  | 0 | -10.224057 | -2.151400 | 0.000000   |
| 128 | 6  | 0 | -8.208237  | -2.463100 | 0.000000   |
| 129 | 6  | 0 | -7.261421  | -3.461500 | 0.000000   |
| 130 | 1  | 0 | -6.359860  | -3.235400 | 0.000000   |
| 131 | 6  | 0 | -7.808863  | -1.114300 | 0.000000   |
| 132 | 46 | 0 | 6.204579   | -6.180600 | 0.000000   |

|     |    |   |           |            |            |
|-----|----|---|-----------|------------|------------|
| 133 | 7  | 0 | 6.224590  | -6.161800  | -2.051246  |
| 134 | 7  | 0 | 1.453953  | -1.412200  | -8.657391  |
| 135 | 7  | 0 | 3.782102  | -3.555300  | -4.120240  |
| 136 | 7  | 0 | 3.057600  | -2.860300  | -5.124898  |
| 137 | 1  | 0 | 2.464974  | -2.247900  | -5.018620  |
| 138 | 7  | 0 | 4.360091  | -4.313800  | -6.105372  |
| 139 | 7  | 0 | 4.778769  | -7.571300  | 0.000000   |
| 140 | 7  | 0 | 0.705268  | -6.484500  | 0.000000   |
| 141 | 7  | 0 | 0.000000  | -8.561500  | 0.000000   |
| 142 | 6  | 0 | 7.085917  | -6.939600  | -2.693653  |
| 143 | 1  | 0 | 7.617308  | -7.527100  | -2.207375  |
| 144 | 6  | 0 | 7.214752  | -6.892700  | -4.068692  |
| 145 | 1  | 0 | 7.850794  | -7.403000  | -4.514665  |
| 146 | 6  | 0 | 6.363042  | -6.059800  | -4.746454  |
| 147 | 1  | 0 | 6.408155  | -6.015600  | -5.673896  |
| 148 | 6  | 0 | 5.443662  | -5.290200  | -4.071874  |
| 149 | 6  | 0 | 5.416297  | -5.392300  | -2.701714  |
| 150 | 1  | 0 | 4.794820  | -4.890300  | -2.225194  |
| 151 | 6  | 0 | 4.525908  | -4.382800  | -4.806063  |
| 152 | 6  | 0 | 3.497067  | -3.354000  | -6.231025  |
| 153 | 6  | 0 | 2.951322  | -2.865800  | -7.511030  |
| 154 | 6  | 0 | 3.455277  | -3.279500  | -8.675140  |
| 155 | 1  | 0 | 4.128231  | -3.919400  | -8.681574  |
| 156 | 6  | 0 | 2.973808  | -2.755400  | -9.900343  |
| 157 | 1  | 0 | 3.328069  | -3.031300  | -10.715072 |
| 158 | 6  | 0 | 1.975586  | -1.839700  | -9.842431  |
| 159 | 1  | 0 | 1.639074  | -1.492200  | -10.636159 |
| 160 | 6  | 0 | 1.944968  | -1.900400  | -7.531960  |
| 161 | 1  | 0 | 1.605274  | -1.588700  | -6.725293  |
| 162 | 6  | 0 | 5.049167  | -8.867600  | 0.000000   |
| 163 | 1  | 0 | 5.941253  | -9.129600  | 0.000000   |
| 164 | 6  | 0 | 4.063884  | -9.877100  | 0.000000   |
| 165 | 1  | 0 | 4.276440  | -10.784600 | 0.000000   |
| 166 | 6  | 0 | 2.798304  | -9.433000  | 0.000000   |
| 167 | 1  | 0 | 2.118916  | -10.067400 | 0.000000   |
| 168 | 6  | 0 | 2.460166  | -8.180800  | 0.000000   |
| 169 | 6  | 0 | 3.445590  | -7.256800  | 0.000000   |
| 170 | 1  | 0 | 3.207295  | -6.357700  | 0.000000   |
| 171 | 6  | 0 | 1.040154  | -7.747800  | 0.000000   |
| 172 | 7  | 0 | -4.778769 | -7.571300  | 0.000000   |
| 173 | 7  | 0 | -0.705268 | -6.484500  | 0.000000   |
| 174 | 6  | 0 | -5.049167 | -8.867600  | 0.000000   |
| 175 | 1  | 0 | -5.941253 | -9.129600  | 0.000000   |
| 176 | 6  | 0 | -4.063884 | -9.877100  | 0.000000   |
| 177 | 1  | 0 | -4.276440 | -10.784600 | 0.000000   |
| 178 | 6  | 0 | -2.798304 | -9.433000  | 0.000000   |
| 179 | 1  | 0 | -2.118916 | -10.067400 | 0.000000   |
| 180 | 6  | 0 | -2.460166 | -8.180800  | 0.000000   |
| 181 | 6  | 0 | -3.445590 | -7.256800  | 0.000000   |
| 182 | 1  | 0 | -3.207295 | -6.357700  | 0.000000   |
| 183 | 6  | 0 | -1.040154 | -7.747800  | 0.000000   |
| 184 | 46 | 0 | -6.204579 | -6.180600  | 0.000000   |
| 185 | 7  | 0 | -6.224590 | -6.161800  | 2.051246   |
| 186 | 7  | 0 | -1.453953 | -1.412200  | 8.657391   |
| 187 | 7  | 0 | -3.782102 | -3.555300  | 4.120240   |
| 188 | 7  | 0 | -3.057600 | -2.860300  | 5.124898   |
| 189 | 1  | 0 | -2.464974 | -2.247900  | 5.018620   |
| 190 | 7  | 0 | -4.360091 | -4.313800  | 6.105372   |
| 191 | 6  | 0 | -7.085917 | -6.939600  | 2.693653   |
| 192 | 1  | 0 | -7.617308 | -7.527100  | 2.207375   |
| 193 | 6  | 0 | -7.214752 | -6.892700  | 4.068692   |
| 194 | 1  | 0 | -7.850794 | -7.403000  | 4.514665   |
| 195 | 6  | 0 | -6.363042 | -6.059800  | 4.746454   |
| 196 | 1  | 0 | -6.408155 | -6.015600  | 5.673896   |
| 197 | 6  | 0 | -5.443662 | -5.290200  | 4.071874   |
| 198 | 6  | 0 | -5.416297 | -5.392300  | 2.701714   |
| 199 | 1  | 0 | -4.794820 | -4.890300  | 2.225194   |
| 200 | 6  | 0 | -4.525908 | -4.382800  | 4.806063   |
| 201 | 6  | 0 | -3.497067 | -3.354000  | 6.231025   |
| 202 | 6  | 0 | -2.951322 | -2.865800  | 7.511030   |
| 203 | 6  | 0 | -3.455277 | -3.279500  | 8.675140   |
| 204 | 1  | 0 | -4.128231 | -3.919400  | 8.681574   |
| 205 | 6  | 0 | -2.973808 | -2.755400  | 9.900343   |
| 206 | 1  | 0 | -3.328069 | -3.031300  | 10.715072  |
| 207 | 6  | 0 | -1.975586 | -1.839700  | 9.842431   |
| 208 | 1  | 0 | -1.639074 | -1.492200  | 10.636159  |
| 209 | 6  | 0 | -1.944968 | -1.900400  | 7.531960   |
| 210 | 1  | 0 | -1.605274 | -1.588700  | 6.725293   |
| 211 | 7  | 0 | -6.224590 | -6.161800  | -2.051246  |



|     |   |   |           |           |            |
|-----|---|---|-----------|-----------|------------|
| 212 | 7 | 0 | -1.453953 | -1.412200 | -8.657391  |
| 213 | 7 | 0 | -3.782102 | -3.555300 | -4.120240  |
| 214 | 7 | 0 | -3.057600 | -2.860300 | -5.124898  |
| 215 | 1 | 0 | -2.464974 | -2.247900 | -5.018620  |
| 216 | 7 | 0 | -4.360091 | -4.313800 | -6.105372  |
| 217 | 6 | 0 | -7.085917 | -6.939600 | -2.693653  |
| 218 | 1 | 0 | -7.617308 | -7.527100 | -2.207375  |
| 219 | 6 | 0 | -7.214752 | -6.892700 | -4.068692  |
| 220 | 1 | 0 | -7.850794 | -7.403000 | -4.514665  |
| 221 | 6 | 0 | -6.363042 | -6.059800 | -4.746454  |
| 222 | 1 | 0 | -6.408155 | -6.015600 | -5.673896  |
| 223 | 6 | 0 | -5.443662 | -5.290200 | -4.071874  |
| 224 | 6 | 0 | -5.416297 | -5.392300 | -2.701714  |
| 225 | 1 | 0 | -4.794820 | -4.890300 | -2.225194  |
| 226 | 6 | 0 | -4.525908 | -4.382800 | -4.806063  |
| 227 | 6 | 0 | -3.497067 | -3.354000 | -6.231025  |
| 228 | 6 | 0 | -2.951322 | -2.865800 | -7.511030  |
| 229 | 6 | 0 | -3.455277 | -3.279500 | -8.675140  |
| 230 | 1 | 0 | -4.128231 | -3.919400 | -8.681574  |
| 231 | 6 | 0 | -2.973808 | -2.755400 | -9.900343  |
| 232 | 1 | 0 | -3.328069 | -3.031300 | -10.715072 |
| 233 | 6 | 0 | -1.975586 | -1.839700 | -9.842431  |
| 234 | 1 | 0 | -1.639074 | -1.492200 | -10.636159 |
| 235 | 6 | 0 | -1.944968 | -1.900400 | -7.531960  |
| 236 | 1 | 0 | -1.605274 | -1.588700 | -6.725293  |
| 237 | 7 | 0 | 6.224590  | -6.161800 | 2.051246   |
| 238 | 7 | 0 | 1.453953  | -1.412200 | 8.657391   |
| 239 | 7 | 0 | 3.782102  | -3.555300 | 4.120240   |
| 240 | 7 | 0 | 3.057600  | -2.860300 | 5.124898   |
| 241 | 1 | 0 | 2.464974  | -2.247900 | 5.018620   |
| 242 | 7 | 0 | 4.360091  | -4.313800 | 6.105372   |
| 243 | 6 | 0 | 7.085917  | -6.939600 | 2.693653   |
| 244 | 1 | 0 | 7.617308  | -7.527100 | 2.207375   |
| 245 | 6 | 0 | 7.214752  | -6.892700 | 4.068692   |
| 246 | 1 | 0 | 7.850794  | -7.403000 | 4.514665   |
| 247 | 6 | 0 | 6.363042  | -6.059800 | 4.746454   |
| 248 | 1 | 0 | 6.408155  | -6.015600 | 5.673896   |
| 249 | 6 | 0 | 5.443662  | -5.290200 | 4.071874   |
| 250 | 6 | 0 | 5.416297  | -5.392300 | 2.701714   |
| 251 | 1 | 0 | 4.794820  | -4.890300 | 2.225194   |
| 252 | 6 | 0 | 4.525908  | -4.382800 | 4.806063   |
| 253 | 6 | 0 | 3.497067  | -3.354000 | 6.231025   |
| 254 | 6 | 0 | 2.951322  | -2.865800 | 7.511030   |
| 255 | 6 | 0 | 3.455277  | -3.279500 | 8.675140   |
| 256 | 1 | 0 | 4.128231  | -3.919400 | 8.681574   |
| 257 | 6 | 0 | 2.973808  | -2.755400 | 9.900343   |
| 258 | 1 | 0 | 3.328069  | -3.031300 | 10.715072  |
| 259 | 6 | 0 | 1.975586  | -1.839700 | 9.842431   |
| 260 | 1 | 0 | 1.639074  | -1.492200 | 10.636159  |
| 261 | 6 | 0 | 1.944968  | -1.900400 | 7.531960   |
| 262 | 1 | 0 | 1.605274  | -1.588700 | 6.725293   |
| 263 | 7 | 0 | -6.224590 | 6.161800  | 2.051246   |
| 264 | 7 | 0 | -1.453953 | 1.412200  | 8.657391   |
| 265 | 7 | 0 | -3.782102 | 3.555300  | 4.120240   |
| 266 | 7 | 0 | -3.057600 | 2.860300  | 5.124898   |
| 267 | 1 | 0 | -2.464974 | 2.247900  | 5.018620   |
| 268 | 7 | 0 | -4.360091 | 4.313800  | 6.105372   |
| 269 | 6 | 0 | -7.085917 | 6.939600  | 2.693653   |
| 270 | 1 | 0 | -7.617308 | 7.527100  | 2.207375   |
| 271 | 6 | 0 | -7.214752 | 6.892700  | 4.068692   |
| 272 | 1 | 0 | -7.850794 | 7.403000  | 4.514665   |
| 273 | 6 | 0 | -6.363042 | 6.059800  | 4.746454   |
| 274 | 1 | 0 | -6.408155 | 6.015600  | 5.673896   |
| 275 | 6 | 0 | -5.443662 | 5.290200  | 4.071874   |
| 276 | 6 | 0 | -5.416297 | 5.392300  | 2.701714   |
| 277 | 1 | 0 | -4.794820 | 4.890300  | 2.225194   |
| 278 | 6 | 0 | -4.525908 | 4.382800  | 4.806063   |
| 279 | 6 | 0 | -3.497067 | 3.354000  | 6.231025   |
| 280 | 6 | 0 | -2.951322 | 2.865800  | 7.511030   |
| 281 | 6 | 0 | -3.455277 | 3.279500  | 8.675140   |
| 282 | 1 | 0 | -4.128231 | 3.919400  | 8.681574   |
| 283 | 6 | 0 | -2.973808 | 2.755400  | 9.900343   |
| 284 | 1 | 0 | -3.328069 | 3.031300  | 10.715072  |
| 285 | 6 | 0 | -1.975586 | 1.839700  | 9.842431   |
| 286 | 1 | 0 | -1.639074 | 1.492200  | 10.636159  |
| 287 | 6 | 0 | -1.944968 | 1.900400  | 7.531960   |
| 288 | 1 | 0 | -1.605274 | 1.588700  | 6.725293   |
| 289 | 7 | 0 | 6.224590  | 6.161800  | -2.051246  |
| 290 | 7 | 0 | 1.453953  | 1.412200  | -8.657391  |

|     |   |   |           |           |            |
|-----|---|---|-----------|-----------|------------|
| 291 | 7 | 0 | 3.782102  | 3.555300  | -4.120240  |
| 292 | 7 | 0 | 3.057600  | 2.860300  | -5.124898  |
| 293 | 1 | 0 | 2.464974  | 2.247900  | -5.018620  |
| 294 | 7 | 0 | 4.360091  | 4.313800  | -6.105372  |
| 295 | 6 | 0 | 7.085917  | 6.939600  | -2.693653  |
| 296 | 1 | 0 | 7.617308  | 7.527100  | -2.207375  |
| 297 | 6 | 0 | 7.214752  | 6.892700  | -4.068692  |
| 298 | 1 | 0 | 7.850794  | 7.403000  | -4.514665  |
| 299 | 6 | 0 | 6.363042  | 6.059800  | -4.746454  |
| 300 | 1 | 0 | 6.408155  | 6.015600  | -5.673896  |
| 301 | 6 | 0 | 5.443662  | 5.290200  | -4.071874  |
| 302 | 6 | 0 | 5.416297  | 5.392300  | -2.701714  |
| 303 | 1 | 0 | 4.794820  | 4.890300  | -2.225194  |
| 304 | 6 | 0 | 4.525908  | 4.382800  | -4.806063  |
| 305 | 6 | 0 | 3.497067  | 3.354000  | -6.231025  |
| 306 | 6 | 0 | 2.951322  | 2.865800  | -7.511030  |
| 307 | 6 | 0 | 3.455277  | 3.279500  | -8.675140  |
| 308 | 1 | 0 | 4.128231  | 3.919400  | -8.681574  |
| 309 | 6 | 0 | 2.973808  | 2.755400  | -9.900343  |
| 310 | 1 | 0 | 3.328069  | 3.031300  | -10.715072 |
| 311 | 6 | 0 | 1.975586  | 1.839700  | -9.842431  |
| 312 | 1 | 0 | 1.639074  | 1.492200  | -10.636159 |
| 313 | 6 | 0 | 1.944968  | 1.900400  | -7.531960  |
| 314 | 1 | 0 | 1.605274  | 1.588700  | -6.725293  |
| 315 | 1 | 0 | 5.728845  | 1.313417  | 0.000000   |
| 316 | 1 | 0 | 1.315089  | 5.691960  | 0.000000   |
| 317 | 1 | 0 | -1.315089 | -5.691960 | 0.000000   |
| 318 | 1 | 0 | -5.728845 | -1.313417 | 0.000000   |

## Computed Geometry and Energy for [CG-2]<sup>4+</sup>

Energy = - 3197.71968491 a.u.

| Center<br>Number | Atomic<br>Number | Atomic<br>Type | Coordinates (Angstroms) |           |           |
|------------------|------------------|----------------|-------------------------|-----------|-----------|
|                  |                  |                | X                       | Y         | Z         |
| 1                | 46               | 0              | 4.253359                | 0.324201  | 0.098450  |
| 2                | 46               | 0              | -3.879047               | -0.659381 | -0.060303 |
| 3                | 6                | 0              | 1.565631                | -3.136498 | 3.027550  |
| 4                | 6                | 0              | 2.971651                | -2.443247 | -2.879633 |
| 5                | 7                | 0              | -3.510674               | -2.127393 | 1.310604  |
| 6                | 7                | 0              | 4.236654                | -1.149017 | 1.502650  |
| 7                | 7                | 0              | -3.343362               | -1.992760 | -1.500203 |
| 8                | 7                | 0              | 0.488736                | -2.658654 | 2.475351  |
| 9                | 7                | 0              | 0.523641                | -2.349795 | -2.779152 |
| 10               | 7                | 0              | 0.041137                | -3.943756 | -4.216627 |
| 11               | 7                | 0              | 4.202211                | -1.080946 | -1.373342 |
| 12               | 7                | 0              | -0.036048               | -4.373916 | 3.756843  |
| 13               | 7                | 0              | 1.443065                | -3.801824 | -4.177959 |
| 14               | 7                | 0              | 1.360864                | -4.166612 | 3.823794  |
| 15               | 6                | 0              | -0.472661               | -3.407535 | 2.973432  |
| 16               | 6                | 0              | 2.931411                | -2.654163 | 2.790025  |
| 17               | 6                | 0              | 1.630874                | -2.833618 | -3.294616 |
| 18               | 6                | 0              | -2.161977               | -2.087243 | -1.982046 |
| 19               | 1                | 0              | -1.495689               | -1.579948 | -1.578237 |
| 20               | 6                | 0              | -1.913011               | -3.256093 | 2.636535  |
| 21               | 6                | 0              | -0.433522               | -3.065950 | -3.359812 |
| 22               | 6                | 0              | 4.155287                | -2.936891 | -3.400024 |
| 23               | 1                | 0              | 4.141563                | -3.549105 | -4.100315 |
| 24               | 6                | 0              | -2.228592               | -2.345920 | 1.684132  |
| 25               | 1                | 0              | -1.547937               | -1.861865 | 1.274322  |
| 26               | 6                | 0              | -2.842624               | -3.687627 | -3.604846 |
| 27               | 1                | 0              | -2.645270               | -4.276138 | -4.296804 |
| 28               | 6                | 0              | 3.065770                | -1.655007 | 1.825985  |
| 29               | 1                | 0              | 2.304031                | -1.334577 | 1.397731  |
| 30               | 6                | 0              | -4.388024               | -2.680630 | -2.157593 |
| 31               | 1                | 0              | -5.265519               | -2.577057 | -1.867589 |
| 32               | 6                | 0              | -1.821954               | -2.957032 | -3.013510 |

|     |   |   |           |           |           |
|-----|---|---|-----------|-----------|-----------|
| 33  | 6 | 0 | -2.903626 | -4.015207 | 3.225866  |
| 34  | 1 | 0 | -2.699098 | -4.638100 | 3.884500  |
| 35  | 6 | 0 | 4.057055  | -3.123678 | 3.406576  |
| 36  | 1 | 0 | 3.991055  | -3.795282 | 4.045735  |
| 37  | 6 | 0 | -4.209303 | -3.826920 | 2.807513  |
| 38  | 1 | 0 | -4.899197 | -4.340354 | 3.160807  |
| 39  | 6 | 0 | -4.140091 | -3.553420 | -3.178045 |
| 40  | 1 | 0 | -4.826053 | -4.041997 | -3.569154 |
| 41  | 6 | 0 | 3.050390  | -1.496806 | -1.856206 |
| 42  | 1 | 0 | 2.262753  | -1.149590 | -1.503944 |
| 43  | 6 | 0 | 5.352183  | -2.513800 | -2.873901 |
| 44  | 1 | 0 | 6.150011  | -2.859510 | -3.202239 |
| 45  | 6 | 0 | -4.458112 | -2.875189 | 1.871303  |
| 46  | 1 | 0 | -5.339866 | -2.738783 | 1.608635  |
| 47  | 6 | 0 | 5.372801  | -1.594621 | -1.879709 |
| 48  | 1 | 0 | 6.187427  | -1.307673 | -1.536605 |
| 49  | 6 | 0 | 5.349509  | -1.650619 | 2.128602  |
| 50  | 1 | 0 | 6.185735  | -1.323111 | 1.885372  |
| 51  | 6 | 0 | 5.274449  | -2.606094 | 3.082180  |
| 52  | 1 | 0 | 6.043109  | -2.904478 | 3.512772  |
| 53  | 1 | 0 | -0.484670 | -4.581098 | -4.779941 |
| 54  | 1 | 0 | 2.036047  | -4.681462 | 4.352053  |
| 55  | 6 | 0 | -3.564142 | 1.552778  | 1.943668  |
| 56  | 6 | 0 | -5.845925 | 0.806370  | 1.669594  |
| 57  | 6 | 0 | -3.983339 | 2.486097  | 2.891514  |
| 58  | 1 | 0 | -2.499626 | 1.478833  | 1.677898  |
| 59  | 6 | 0 | -6.265220 | 1.740701  | 2.617027  |
| 60  | 1 | 0 | -6.580309 | 0.144172  | 1.188296  |
| 61  | 6 | 0 | -5.334015 | 2.580379  | 3.228048  |
| 62  | 1 | 0 | -7.329779 | 1.814754  | 2.882280  |
| 63  | 1 | 0 | -5.664369 | 3.316593  | 3.975041  |
| 64  | 6 | 0 | -5.437579 | 1.099131  | -1.927742 |
| 65  | 6 | 0 | -3.093134 | 1.666960  | -1.786587 |
| 66  | 6 | 0 | -5.633673 | 2.135718  | -2.840023 |
| 67  | 1 | 0 | -6.284131 | 0.466553  | -1.623617 |
| 68  | 1 | 0 | -2.091522 | 1.482222  | -1.371714 |
| 69  | 6 | 0 | -4.559754 | 2.938717  | -3.225198 |
| 70  | 1 | 0 | -6.635025 | 2.321157  | -3.254930 |
| 71  | 1 | 0 | -4.714658 | 3.756207  | -3.944126 |
| 72  | 6 | 0 | 5.658762  | 2.226199  | 1.946681  |
| 73  | 6 | 0 | 3.254380  | 2.466451  | 1.948418  |
| 74  | 6 | 0 | 5.761947  | 3.252478  | 2.885472  |
| 75  | 1 | 0 | 6.565577  | 1.726776  | 1.575791  |
| 76  | 6 | 0 | 3.155311  | 3.508219  | 2.918430  |
| 77  | 1 | 0 | 2.265782  | 2.156616  | 1.579431  |
| 78  | 6 | 0 | 4.611470  | 3.886573  | 3.355364  |
| 79  | 1 | 0 | 6.750192  | 3.562970  | 3.254533  |
| 80  | 1 | 0 | 4.693071  | 4.695984  | 4.095187  |
| 81  | 6 | 0 | 5.248002  | 2.407803  | -1.819360 |
| 82  | 6 | 0 | 2.839134  | 2.241436  | -1.727407 |
| 83  | 6 | 0 | 5.141556  | 3.423395  | -2.769342 |
| 84  | 1 | 0 | 6.239257  | 2.072871  | -1.480938 |
| 85  | 6 | 0 | 2.732848  | 3.256670  | -2.678413 |
| 86  | 1 | 0 | 1.931378  | 1.775897  | -1.316644 |
| 87  | 6 | 0 | 3.883926  | 3.847707  | -3.199223 |
| 88  | 1 | 0 | 6.048866  | 3.889028  | -3.180700 |
| 89  | 1 | 0 | 3.800229  | 4.648121  | -3.948539 |
| 90  | 6 | 0 | -2.955711 | 3.414105  | 3.565592  |
| 91  | 6 | 0 | -0.776915 | 3.790287  | 3.533361  |
| 92  | 7 | 0 | -2.666126 | 4.486500  | 4.509962  |
| 93  | 7 | 0 | -1.366182 | 4.739612  | 4.505977  |
| 94  | 7 | 0 | -1.860239 | 3.013825  | 2.991382  |
| 95  | 1 | 0 | -3.344302 | 4.958063  | 5.073617  |
| 96  | 7 | 0 | -4.418881 | 0.684323  | 1.390745  |
| 97  | 7 | 0 | 4.404568  | 1.832783  | 1.478239  |
| 98  | 6 | 0 | -3.289653 | 2.704446  | -2.698406 |
| 99  | 6 | 0 | -2.124206 | 3.646081  | -3.054294 |
| 100 | 6 | 0 | 0.025888  | 4.613853  | -3.479909 |
| 101 | 7 | 0 | -0.705817 | 3.782539  | -2.799083 |
| 102 | 7 | 0 | -2.345501 | 4.652549  | -3.846790 |
| 103 | 7 | 0 | -1.114099 | 5.063908  | -3.913361 |
| 104 | 1 | 0 | -0.833036 | 5.910736  | -4.364899 |
| 105 | 7 | 0 | -4.166844 | 0.864412  | -1.401097 |
| 106 | 7 | 0 | 4.096438  | 1.816847  | -1.297931 |

---
